# Supplementary material for: The Lanostane Triterpenoids in Poria cocos Play Beneficial Roles in Immunoregulatory Activity
Source: PubMed Central journal article supplement (PMC7912843; doi:10.3390/life11020111), 2021-02-01
Supplement: life-11-00111-s001.pdf [file life-11-00111-s001.pdf]

# The Lanostane Triterpenoids in *Poria cocos* Play Beneficial Roles in Immunoregulatory Activity

Chien-Liang Chao<sup>1</sup>, Hsin-Wen Huang<sup>1</sup>, Muh-Hwan Su<sup>1,2</sup>, Hang-Ching Lin<sup>1,2,\*</sup> and Wen-Mein Wu<sup>3,\*</sup>

<sup>1</sup> Sinphar Pharmaceutical Co., Ltd., Sinphar group, Yilan 269, Taiwan;

<sup>2</sup> School of Pharmacy, National Defense Medical Center, Taipei 114, Taiwan;

<sup>3</sup> Department of Nutritional Science, Fu-Jen Catholic University, Hsinchuang 24205, Taiwan;

\* Correspondence: [lhc@sinphar.com.tw](mailto:lhc@sinphar.com.tw) (H.-C.L.); [050582@mail.fju.edu.tw](mailto:050582@mail.fju.edu.tw) (W.-M.W.); Tel.: +886-2-2905-3633 (W.-M.W.); +886-2-87923100 (ext.18879) (H.-C.L.)

## 1. The Characteristics of Triterpenoid Compounds (1–4).

Tumulosic Acid (1): white powder; ESI-MS m/z: 485.3635 [M-H]<sup>-</sup>; <sup>1</sup>H NMR (400 MHz, Pyridine-d<sub>5</sub>) and <sup>13</sup>C-NMR (100 MHz, Pyridine-d<sub>5</sub>) data see Table S1.

Polyporenic Acid C (2): white powder; ESI-MS m/z: 481.3332 [M-H]<sup>-</sup>; <sup>1</sup>H NMR (400 MHz, Pyridine-d<sub>5</sub>) and <sup>13</sup>C-NMR (100 MHz, Pyridine-d<sub>5</sub>) data see Table S1.

3-Epi-Dehydrotumulosic Acid (3): white powder; ESI-MS m/z: 483.3533 [M-H]<sup>-</sup>; <sup>1</sup>H NMR (400 MHz, Pyridine-d<sub>5</sub>) and <sup>13</sup>C-NMR (100 MHz, Pyridine-d<sub>5</sub>) data see Table S1.

Dehydrotumulosic Acid (4): white powder; ESI-MS m/z: 483.3475 [M-H]<sup>-</sup>; <sup>1</sup>H NMR (400 MHz, Pyridine-d<sub>5</sub>) and <sup>13</sup>C-NMR (100 MHz, Pyridine-d<sub>5</sub>) data see Table S1.

**Table 1.** <sup>1</sup>H NMR (400 MHz) and <sup>13</sup>C (100 MHz) Spectroscopic Data for 1-4.

| no. | 1                                     |                 | 2                              |                 | 3                               |                 | 4                                    |                 |
|-----|---------------------------------------|-----------------|--------------------------------|-----------------|---------------------------------|-----------------|--------------------------------------|-----------------|
|     | <sup>1</sup> H multi (J in Hz)        | <sup>13</sup> C | <sup>1</sup> H multi (J in Hz) | <sup>13</sup> C | <sup>1</sup> H multi (J in Hz)  | <sup>13</sup> C | <sup>1</sup> H multi (J in Hz)       | <sup>13</sup> C |
| 1   | 1.65 (br t, J = 13)                   | 36.58 t         | 1.65 (td, J=14, 4.3); 2.09 (m) | 36.8 t          | 2.26 (m); 1.72 (br d, J=12.4)   | 30.6 t          | 1.97 (m); 2.57 (m)                   | 36.74 t         |
| 2   | 1.88 (m) : 1.96 (m)                   | 29.13 t         | 2.3; 2.75 (m)                  | 34.9 t          | 1.88 (dd, J=13.7, 8.4) 2.07 (m) | 26.7 t          | 1.51 (m); 1.95 (m)                   | 29.14 t         |
| 3   | 3.43 (t, J = 8.0)                     | 78.53 d         |                                | 215.2 s         | 3.62 (s)                        | 75.1 d          | 3.48 (t, J=8.0)                      | 78.47 d         |
| 4   |                                       | 40.02 s         |                                | 47.5 s          |                                 | 38.0 s          |                                      | 39.82 s         |
| 5   | 1.18 (d, J = 3.8)                     | 51.42 d         | 1.59 (dd, J=11.5, 3.7)         | 51.0 d          | 2.01 (br t, J=8.3)              | 43.7 d          | 1.32 (d, J=3.8)                      | 50.27 d         |
| 6   | 1.56 (m) : 1.76 (m)                   | 19.21 t         | 1.96 (m); 2.13 (m)             | 23.9 t          | 2.10 (m); 2.10 (m)              | 23.4 t          | 2.16 (m)                             | 23.99 t         |
| 7   | 2.13 (m)                              | 27.47 t         | 5.57 (br d, J=6)               | 120.7 d         | 5.62 (s)                        | 121.3 d         | 5.65 (br s)                          | 121.76 d        |
| 8   |                                       | 135.39 s        |                                | 142.8 s         |                                 | 142.8 s         |                                      | 143.19 s        |
| 9   |                                       | 135.29 s        |                                | 144.7 s         |                                 | 146.7 s         |                                      | 146.86 s        |
| 10  |                                       | 37.88 s         |                                | 37.5 s          |                                 | 37.9 s          |                                      | 38.34 s         |
| 11  | 2.01 (m)                              | 21.46 t         | 5.35 (br d, J=5.6)             | 117.7 d         | 5.46 (d, J=5.7)                 | 116.2 d         | 5.40 (br s)                          | 117.02 d        |
| 12  | 2.20 (d, J = 12.5) : 2.00 (m)         | 30.20 t         | 2.37; 2.67 (br d, J=18.2)      | 36.3 t          | 2.64 (br d, J=15.6); 2.40 (m)   | 36.3 t          | 2.71 (d, J=12.5); 2.42 (m)           | 36.79 t         |
| 13  |                                       | 49.22 s         |                                | 45.0 s          |                                 | 45.1 s          |                                      | 45.56 s         |
| 14  |                                       | 46.76 s         |                                | 49.4 s          |                                 | 49.5 s          |                                      | 49.89 s         |
| 15  | 1.74 (d, J=13) : 2.42 (dd, J=13, 8)   | 44.18 t         | 2.42; 1.91 (d, J=13)           | 44.4 t          | 2.40 (m)                        | 44.5 t          | 1.74 (d, J=13); 2.42 (dd, J=13, 8)   | 44.92 t         |
| 16  | 4.56 (t, J=6.8)                       | 77.16 d         | 4.52 (t, J=7, 6.8)             | 76.4 d          | 4.51 (t, J=7.2, 6.5)            | 76.5 d          | 4.56 (t, J=6.8)                      | 76.91 d         |
| 17  | 2.80 (dd, J=11.1, 5.9)                | 57.79 d         | 2.86 (dd, J=11.2, 5.8)         | 57.6 d          | 2.85 (dd, J=11.1, 5.7)          | 57.6 d          | 2.92 (dd, J=11.1, 5.9)               | 58.12 d         |
| 18  | 1.17 (s)                              | 18.28 q         | 1.04 (s)                       | 17.6 q          | 1.08 (s)                        | 17.7 q          | 1.09 (s)                             | 18.11 q         |
| 19  | 1.05 (s)                              | 19.42 q         | 1.12 (s)                       | 22.0 q          | 1.09 (s)                        | 23.0 q          | 1.09 (s)                             | 23.47 q         |
| 20  | 2.93 (m)                              | 49.28 d         | 2.94 (m)                       | 48.5 d          | 2.94 (br t, J=9.5)              | 48.6 d          | 2.92 (m)                             | 49.03 d         |
| 21  |                                       | 179.49 s        |                                | 178.7 s         |                                 | 178.7 s         |                                      | 177.87 s        |
| 22  | 2.66 (m) : 2.50 (m)                   | 32.08 t         | 2.46 (m); 2.62 (m)             | 31.4 t          | 2.45 (m); 2.70 (m)              | 31.5 t          | 2.51 (m); 2.43 (m)                   | 31.94 t         |
| 23  | 2.41 (br t, J=12) : 2.57 (br t, J=12) | 33.72 t         | 2.41 (m); 2.53 (m)             | 33.2 t          | 2.37; 2.52 (t, J=11.6)          | 33.2 t          | 2.41 (br t, J=12); 2.53 (br t, J=12) | 33.69 t         |
| 24  |                                       | 156.58 s        |                                | 156.0 s         |                                 | 156.1 s         |                                      | 156.52 s        |

|    |                     |          |                     |         |                     |         |                     |          |
|----|---------------------|----------|---------------------|---------|---------------------|---------|---------------------|----------|
| 25 | 2.30 (m)            | 34.61 d  | 2.25 (m)            | 34.1 d  | 2.26 (m)            | 34.1 d  | 2.33 (m)            | 34.58 d  |
| 26 | 0.97 (d, J=6.75)    | 22.52 q  | 0.97 (dd, J=7.2)    | 22.0 q  | 0.96 (d, J=7)       | 22.0 q  | 1.01 (d, J=6.75)    | 22.48 q  |
| 27 | 0.98 (d, J=6.75)    | 22.38 q  | 0.99 (dd, J=7.2)    | 21.9 q  | 0.98 (d, J=7)       | 21.9 q  | 1.01 (d, J=6.75)    | 22.34 q  |
| 28 | 1.23 (s)            | 29.15 q  | 1.12 (s)            | 25.7 q  | 1.18 (s)            | 29.2 q  | 1.23 (s)            | 29.31 q  |
| 29 | 1.06 (s)            | 16.87 q  | 1.04 (s)            | 22.4 q  | 0.98 (s)            | 23.2 q  | 1.15 (s)            | 17.12 q  |
| 30 | 1.47 (s)            | 25.94 q  | 1.44 (s)            | 26.4 q  | 1.42 (s)            | 26.6 q  | 1.53 (s)            | 27.08 q  |
| 31 | 4.83 (s) ; 4.97 (s) | 107.01 t | 4.83 (s) ; 4.97 (s) | 107.5 t | 4.83 (s) ; 5.02 (s) | 107.1 t | 4.86 (s) ; 5.00 (s) | 107.51 t |

## 2. Chromatogram of Triterpenoid Compounds (1-4) using UPLC/MS.

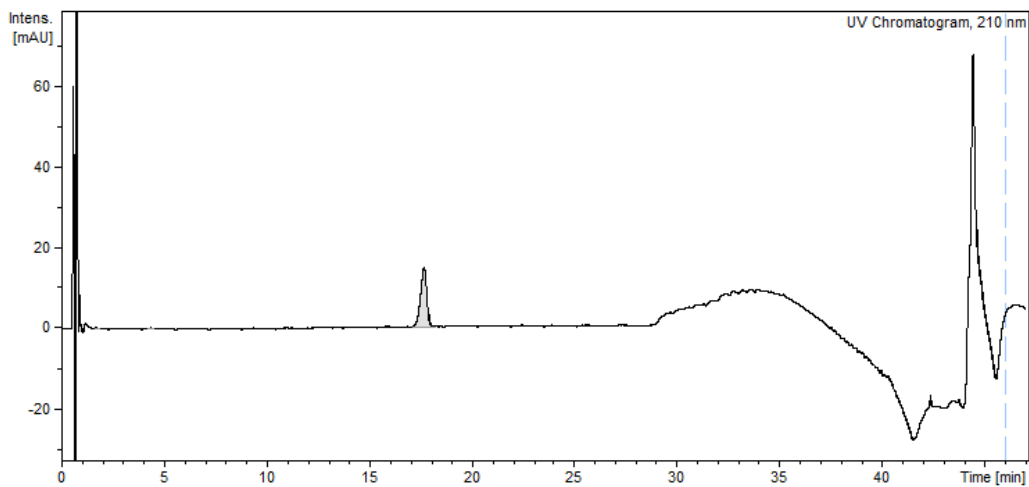

Figure S1. The UPLC chromatogram of tumulosic acid (1).

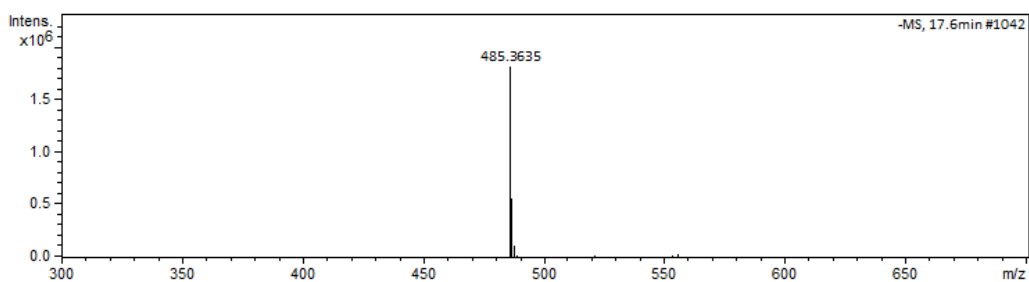

Figure S2. The ESI-MS spectrum of tumulosic acid (1).

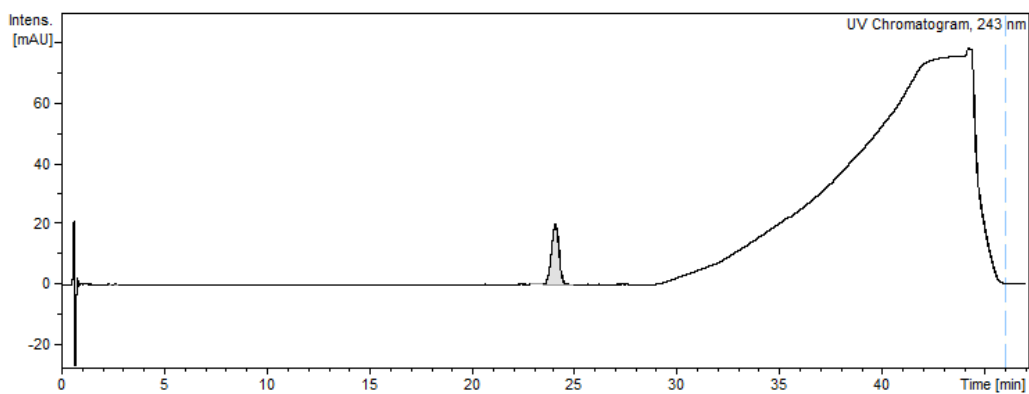

Figure S3. The UPLC chromatogram of polypropenic acid C (2).

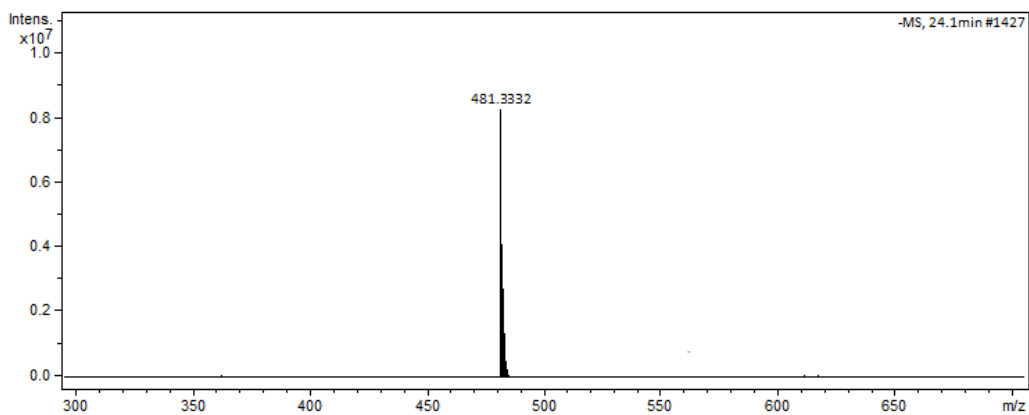

**Figure S4.** The ESI-MS spectrum of polyporenic acid C (2).

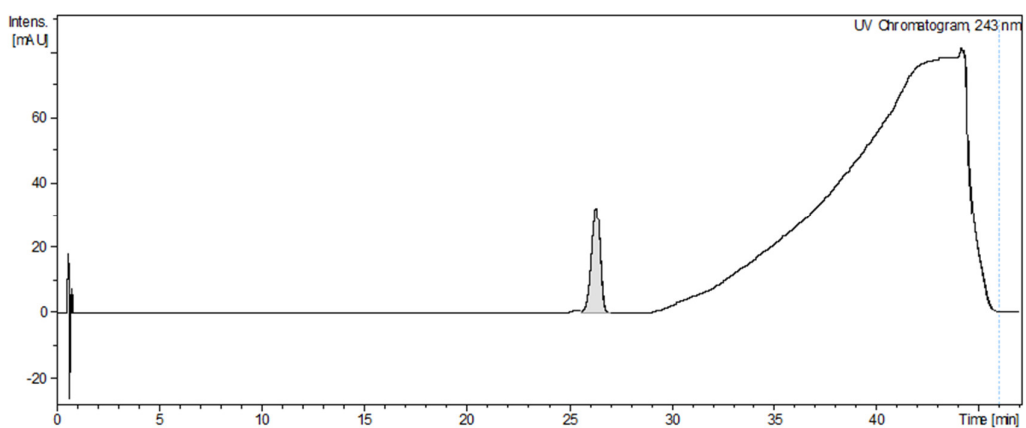

**Figure S5.** The UPLC chromatogram of 3-epi-dehydrotumulosic acid (3).

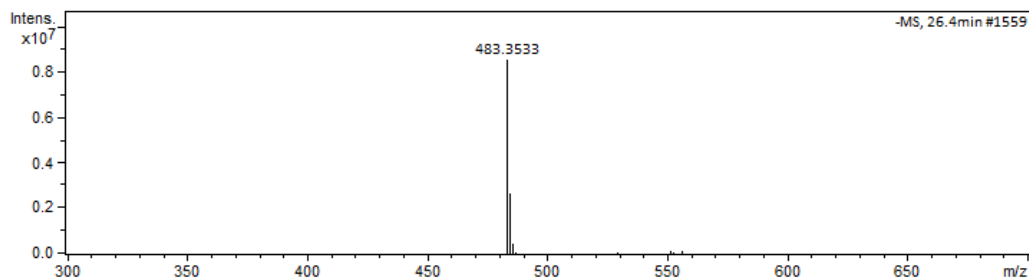

**Figure S6.** The ESI-MS spectrum of 3-epi-dehydrotumulosic acid (3).

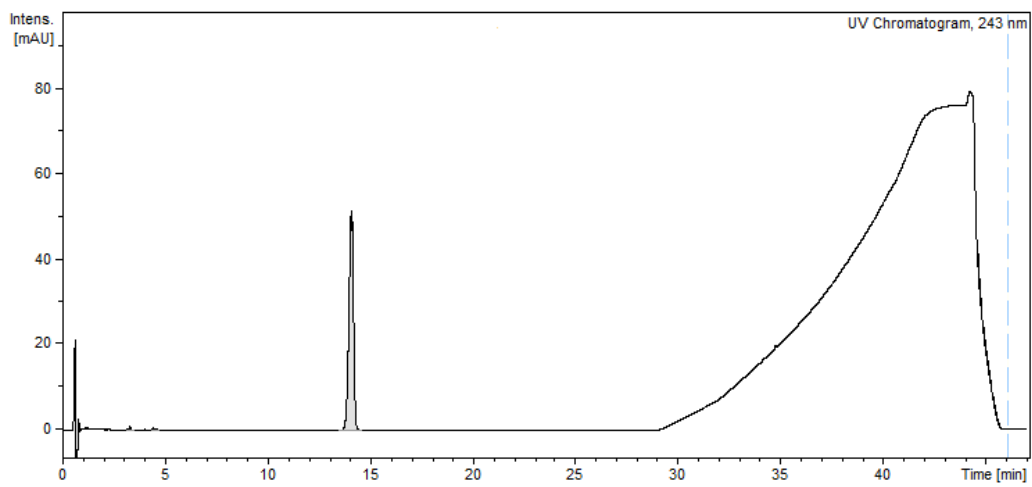

**Figure S7.** The UPLC chromatogram of dehydrotumulosic acid (4).

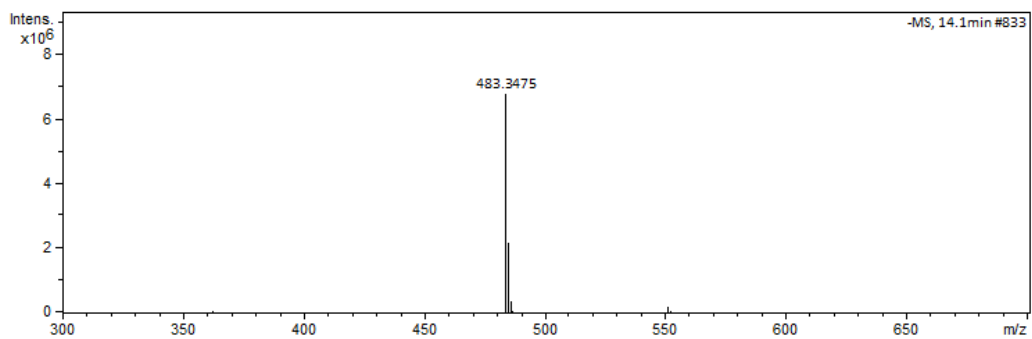

**Figure S8.** The ESI-MS spectrum of dehydrotumulosic acid (4).
